# Supplementary material for: Association between IL-1A and IL-1B gene polymorphisms with peri-implantitis in a Portuguese population—a pilot study
Source: PeerJ. 2022 Jul 14;10:e13729. doi: 10.7717/peerj.13729 (PMC9288821; doi:10.7717/peerj.13729)
Supplement: Supplemental Information 1 — Distribution of interleukin-1 genotype in the population studied [file peerj-10-13729-s001.xlsx]

## Sheet: SHEET 1
PATIENTS	PRESENCE OF PERI-IMPLANTITIS	GENOTYPE OF IL-1 A -889	PRESENCE OF AT LEAST ONE ALLELE 2 OF IL-A -889	GENOTYPE OF IL-1 B +3954	PRESENCE OF AT LEAST ONE ALLELE 2 OF IL-A -889
1	YES	C/T	YES	C/C	NO
2	NO	C/T	YES	C/C	NO
3	NO	C/C	NO	C/C	NO
4	NO	C/C	NO	C/C	NO
5	NO	C/C	NO	C/C	NO
6	NO	C/T	YES	C/T	YES
7	NO	C/C	NO	C/C	NO
8	YES	C/C	NO	C/C	NO
9	NO	C/C	NO	C/C	NO
10	NO	C/C	NO	C/C	NO
11	NO	C/T	YES	C/C	NO
12	YES	C/C	NO	C/C	NO
13	NO	C/C	NO	C/T	YES
14	YES	C/T	YES	C/T	YES
15	YES	C/C	NO	C/T	YES
16	YES	C/T	YES	C/T	YES
17	YES	C/T	YES	C/T	YES
18	YES	C/T	YES	T/T	YES
19	YES	C/C	NO	C/C	NO
20	YES	C/T	YES	C/T	YES
C- CYTOSINE/ T-THYMINE

## Sheet: SHEET 2
PATIENTS	PRESENCE OF PERI-IMPLANTITIS	SEX	AGE	HISTORY OF PERIODONTITIS	SMOKING	IL-1A -889 ALLELE 2 CARRIERS	IL-1B +3954 ALLELE 2 CARRIERS
1	YES	F	62	NO	NO	YES	NO
2	NO	F	43	NO	NO	YES	NO
3	NO	F	53	YES	NO	NO	NO
4	NO	M	52	NO	NO	NO	NO
5	NO	M	55	NO	NO	NO	NO
6	NO	M	47	NO	NO	YES	YES
7	NO	M	32	NO	NO	NO	NO
8	YES	F	62	NO	NO	NO	NO
9	NO	M	77	YES	NO	NO	NO
10	NO	M	55	YES	NO	NO	NO
11	NO	F	65	YES	NO	YES	NO
12	YES	M	74	YES	NO	NO	NO
13	NO	F	79	YES	NO	NO	YES
14	YES	F	61	YES	YES	YES	YES
15	YES	F	36	YES	NO	NO	YES
16	YES	M	53	YES	YES	YES	YES
17	YES	F	65	YES	NO	YES	YES
18	YES	F	65	YES	YES	YES	YES
19	YES	F	66	YES	NO	NO	NO
20	YES	M	45	YES	NO	YES	YES
ALLELE 2 - allele with nucleotide sequence changed
